# Supplementary material
Source: Royal Society of Chemistry journal article supplement (doi:10.1039/d6ta01732k)
Supplement: d6ta01732k1.pdf [file d6ta01732k1.pdf]

## Electronic Supplementary Information (ESI)

### **Synergistic CuO/MgO Nucleation for Low-Supercooling Na<sub>2</sub>SO<sub>4</sub>·10H<sub>2</sub>O in Battery Thermal Management**

Jin Guk Kim <sup>a,b,1</sup>, Youngho Kim <sup>b,c</sup>, Yeongjin Kim <sup>d,e</sup>, Da Seul Kim <sup>d</sup>, Jae-Young Choi <sup>d,e,\*</sup>, Jeong Min Baik <sup>d,\*</sup>, Hak Ki Yu <sup>a, b,\*</sup>

<sup>a</sup>*Department of Energy Systems Research, Ajou University, Suwon 16499, South Korea*

<sup>b</sup>*Department of Materials Science and Engineering, Ajou, University, Suwon 16499, South Korea*

<sup>c</sup>*Engineering Research Institute, Ajou University, Suwon 16499, Republic of Korea*

<sup>d</sup>*School of Advanced Materials Science and Engineering, Sungkyunkwan University, Suwon, 16419, Republic of Korea*

<sup>e</sup>*SKKU of Advanced Institute of Nanotechnology (SAINT), Sungkyunkwan University, Suwon, 16419, Republic of Korea*

\* CORRESPONDING AUTHOR: [hakkiyu@ajou.ac.kr](mailto:hakkiyu@ajou.ac.kr) (H. K. Yu)

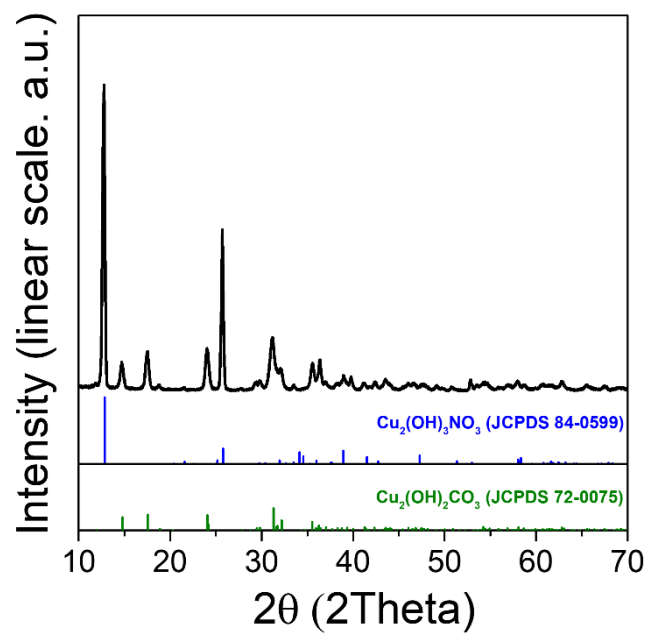

Fig. S1 XRD pattern of  $\text{Cu}_2(\text{OH})_3\text{NO}_3$  and  $\text{Cu}_2(\text{OH})_2\text{CO}_3$  precursor nanostructures before calcination.

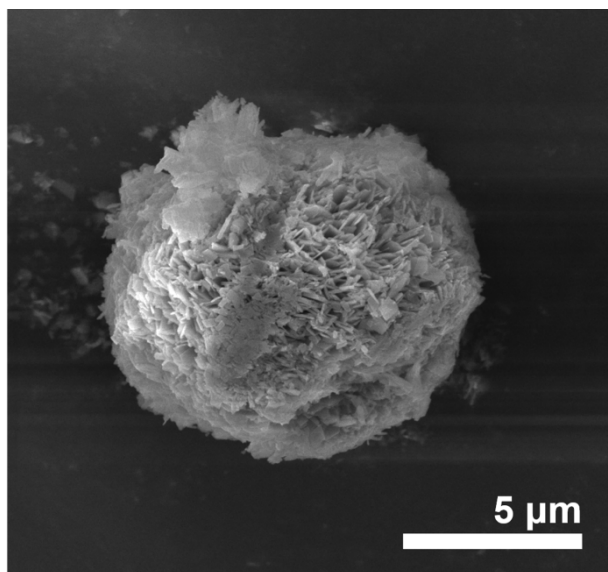

Fig. S2 SEM image of Cu-based Nanoflower Precursor before calcination.

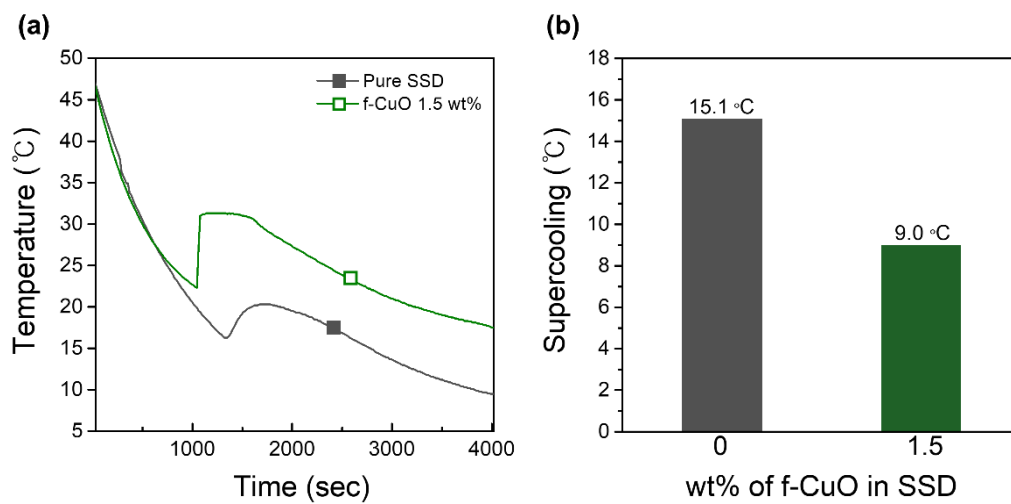

Fig. S3 Cooling curve data. (a) Cooling curve for f-CuO 1.5 wt% and (b) Supercooling degree at Pure SSD and f-CuO 1.5 wt%.

Fig. S4 Cooling curve data. (a) Cooling curve for different ratios of f-CuO and p-MgO (2.5 wt%), and (b) Supercooling degree at different ratios of f-CuO and p-MgO (2.5 wt%).

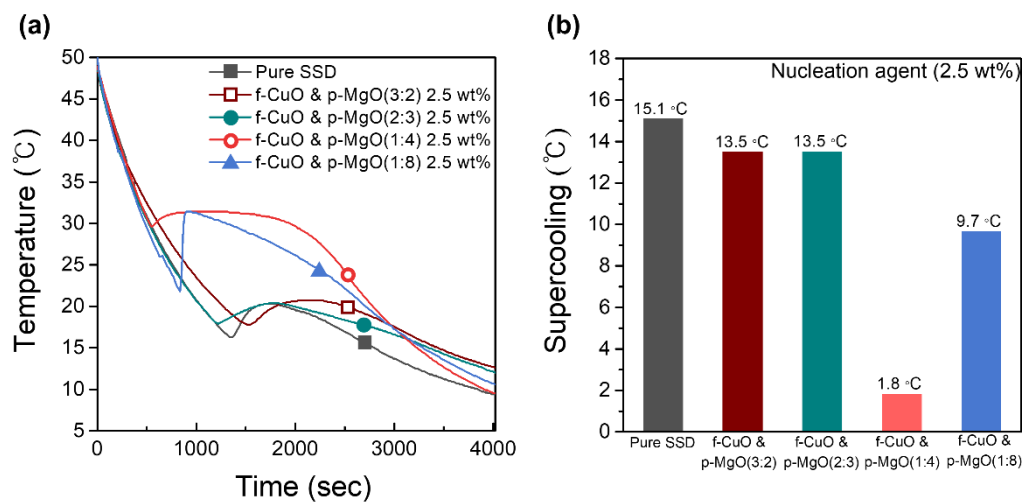

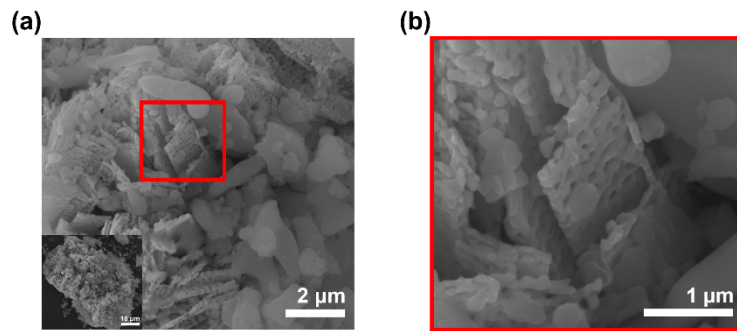

Fig. S5 SEM image of SSD grown on the nanoplates of f-CuO, and (b) High magnification SEM image of the red-boxed area in (a)

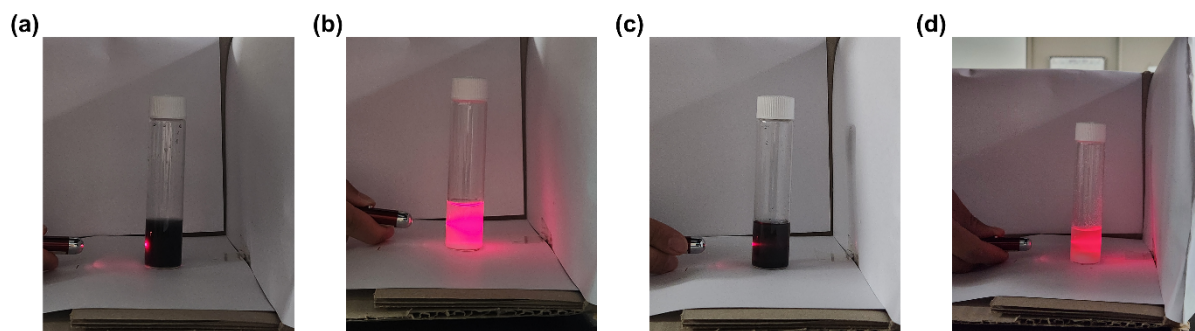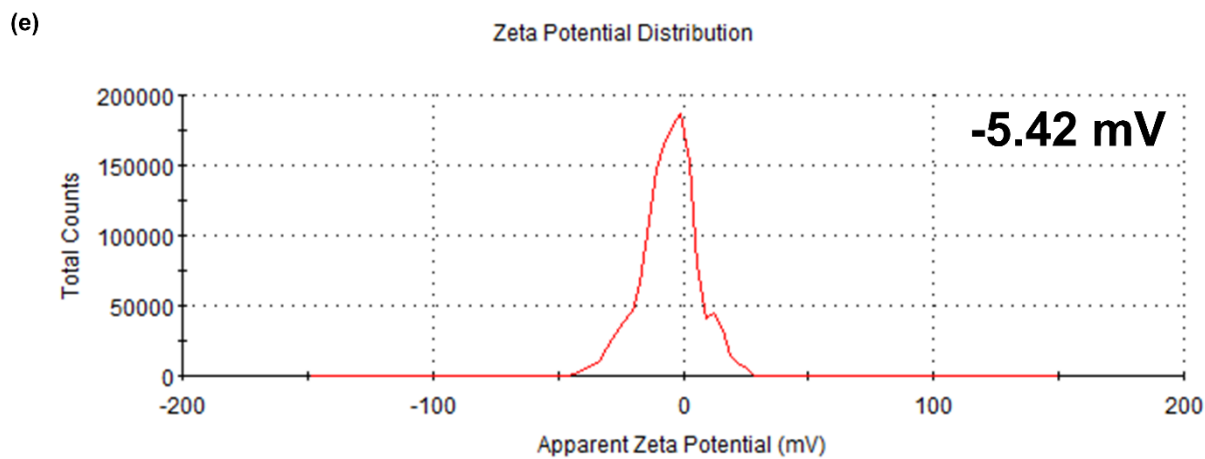

**Fig. S6 (a) Photograph of f-CuO (0.5 g), (b) p-MgO (0.5 g) and (c) f-CuO:p-MgO (1:4, total 0.5 g) dispersed in DI water (15 mL) under red laser irradiation for comparative assessment of dispersion behavior. (d) Photograph of molten Pure SSD (20 g) under red laser irradiation for comparative assessment of dispersion behavior. (e) Zeta potential analysis of f-CuO & p-MgO(1:4) in water.**

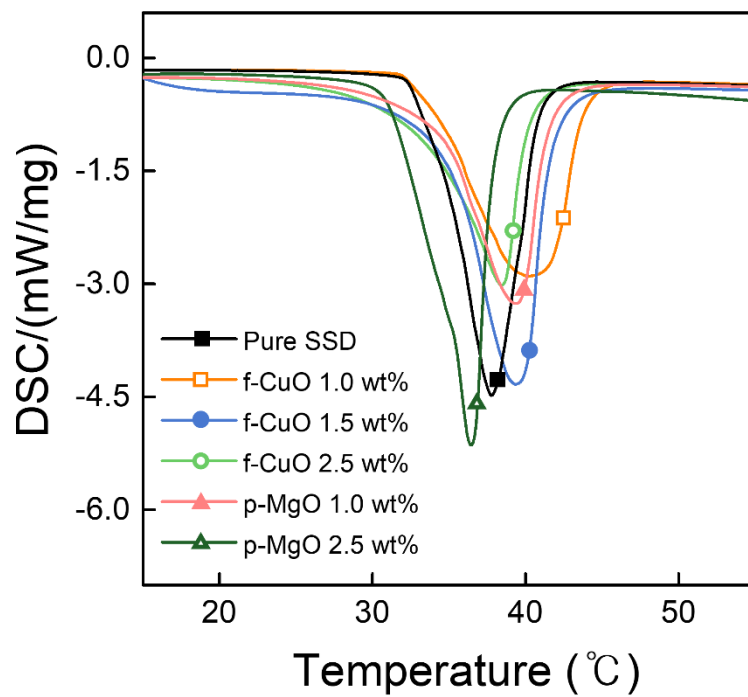

Fig. S7 DSC curves of pure SSD and SSD composites containing f-CuO (0-2.5 wt%), p-MgO (0-2.5 wt%).

**Table S1 Standard deviation values used for the error bars in Fig. 3(f).**

| Nucleation agent condition | Supercooling degree standard deviation (°C) |
|----------------------------|---------------------------------------------|
| Pure SSD                   | 0.10                                        |
| f-CuO 2.5 wt%              | 1.19                                        |
| p-MgO 2.5 wt%              | 0.10                                        |
| f-CuO & p-MgO(1:4) 2.5 wt% | 0.15                                        |

**Table S2 Comparison of Latent Heat for Different Nucleation Agents.**

| Sample              | Latent heat ( $\Delta H$ ) [ $Jg^{-1}$ ] |
|---------------------|------------------------------------------|
| Pure SSD            | -222.9                                   |
| SSD + 1.0 wt% f-CuO | -220.2                                   |
| SSD + 1.5 wt% f-CuO | -193.2                                   |
| SSD + 2.5 wt% f-CuO | -175.6                                   |
| SSD + 1.0 wt% p-MgO | -195.2                                   |
| SSD + 2.5 wt% p-MgO | -206.5                                   |

**Table S3 Comparison of nucleation agents for SSD nucleation**

| Primary nucleation agent | Secondary additives    | $\Delta T_s$ (°C) | Latent heat (J g <sup>-1</sup> ) | Reference |
|--------------------------|------------------------|-------------------|----------------------------------|-----------|
| Borax                    | NFC, Graphite          | 3.6               | 121.1                            | 1         |
| Borax                    | Graphene nanoplatelets | 5.1               | 217.1                            | 2         |
| Borax                    | Al/C nanoparticle      | 2.2               | 206                              | 3         |
| Borax                    | CMC, EG                | 8.03              | 114.0                            | 4         |
| Borax, ZnO               | CMC                    | 3.3               | 210.6                            | 5         |
| SiC                      | -                      | 21.2              | 184.8                            | 6         |
| Boron Nitride            | -                      | 1.91              | 214.4                            | 7         |
| f-CuO & p-MgO            | CMC                    | 1.8               | 184.8                            | This work |

**Table S4 Temperature standard deviation values of pure Al-ad used for the error bars in Fig. 7(d).**

| Time (sec) | Temperature standard deviation (°C) |
|------------|-------------------------------------|
| 240        | 0.321                               |
| 480        | 0.153                               |
| 720        | 0.20                                |
| 960        | 0.173                               |

**Table S5 Temperature standard deviation values of SSD-C coated Al-ad used for the error bars in Fig. 7(d).**

| Time (sec) | Temperature standard deviation (°C) |
|------------|-------------------------------------|
| 240        | 0.252                               |
| 480        | 0.208                               |
| 720        | 0.153                               |
| 960        | 0.100                               |
| 1260       | 0.173                               |

## Notes and references

- 1 K. Oh, Z. Shen, S. Kwon and M. Toivakka, *Cellulose*, 2021, 28, 6845–6856.
- 2 A. K. Pandey, B. Kalidasan, Z. Said, Y. K. Mishra and J.-Y. Hwang, *Materials Today Sustainability*, 2024, 27, 100934.
- 3 X. Liu, J. Tie, Z. Wang, Y. Xia, C.-A. Wang and S. Tie, *Journal of Materials Research and Technology*, 2021, 12, 982–988.
- 4 C. Li, B. Zhang, B. Xie, X. Zhao and J. Chen, *Energy Conversion and Management*, 2020, 208, 112586.
- 5 B. Kalidasan, A. K. Pandey, Fatemeh.S.Mirsafi, T. Leissner, H.-G. Rubahn, S. Rahman and Y. K. Mishra, *Journal of Energy Storage*, 2025, 124, 116680.
- 6 W. Chen, Q. Chen, Y. Yu, H. Gao and B. Ma, *ChemPlusChem*, 2025, 90, e202400542.
- 7 X. Meng, F. Ma, J. Han, Q. Pang, M. Cai and L. Wang, *J Therm Anal Calorim*, 2025, 150, 13999–14008.
